# Supplementary material for: Explaining the effects of two different strategies for promoting hand hygiene in hospital nurses: a process evaluation alongside a cluster randomised controlled trial
Source: PubMed Central journal article supplement (PMC3646709; doi:10.1186/1748-5908-8-41), 2013-04-08
Supplement: 1748-5908-8-41-S2.pdf [file 1748-5908-8-41-S2.pdf]

## Additional file 2. Adherence of nursing wards to strategy components

| <b>State-of-the-art group n=47</b>          |                                                                                    |                  |
|---------------------------------------------|------------------------------------------------------------------------------------|------------------|
| <b>Component</b>                            | <b>Improvement activities</b>                                                      | <b>Adherence</b> |
| Education                                   | Presence educational website and knowledge quiz ( <i>content</i> )                 | 100%             |
|                                             | Participation in knowledge quiz ( <i>coverage</i> )                                | 11%              |
|                                             | Presence of leaflets ( <i>content</i> )                                            | 100%             |
|                                             | HH promotion event ( <i>content</i> )                                              | 68%              |
| Reminders                                   | Three newsletters to ward manager ( <i>content</i> )                               | 100%             |
|                                             | Publication in hospital magazine ( <i>content</i> )                                | 100%             |
|                                             | Distribution of hand hygiene posters twice ( <i>content</i> )                      | 100%             |
|                                             | Presence of hand hygiene posters on the wards ( <i>coverage</i> )                  | 100%             |
| Performance feedback                        | Distribution performance feedback reports to ward manager twice ( <i>content</i> ) | 100%             |
| Facilities and products                     | Presence of hand hygiene products ( <i>content</i> )                               | 100%             |
|                                             | Acceptable access to washstands / hand rub ( <i>coverage</i> )                     | 45%              |
| <b>Team and leaders-directed group n=20</b> |                                                                                    |                  |
| <b>Component</b>                            | <b>Improvement activities</b>                                                      | <b>Adherence</b> |
| Education                                   | Presence educational website and knowledge quiz ( <i>content</i> )                 | 100%             |
|                                             | Participation in knowledge quiz ( <i>coverage</i> )                                | 37%              |
|                                             | Presence of leaflets ( <i>content</i> )                                            | 100%             |
|                                             | HH promotion event ( <i>content</i> )                                              | 75%              |
| Reminders                                   | Three newsletters to ward manager ( <i>content</i> )                               | 100%             |
|                                             | Publication in hospital magazine ( <i>content</i> )                                | 100%             |
|                                             | Distribution of hand hygiene posters twice ( <i>content</i> )                      | 100%             |
|                                             | Presence of hand hygiene posters on the wards ( <i>coverage</i> )                  | 100%             |
| Performance feedback                        | Distribution performance feedback reports to ward manager twice ( <i>content</i> ) | 100%             |
| Facilities and products                     | Presence of hand hygiene products ( <i>content</i> )                               | 100%             |
|                                             | Acceptable access to washstands / hand rub ( <i>coverage</i> )                     | 40%              |

|                           |                                                                                                                            |      |
|---------------------------|----------------------------------------------------------------------------------------------------------------------------|------|
| Setting norms and targets | Team discussion organised ( <i>content</i> )                                                                               | 100% |
|                           | Number of team discussions ( <i>dosage</i> )                                                                               | 92%  |
|                           | Nurses' participation in team discussions ( <i>coverage</i> )                                                              | 50%  |
|                           | Time spent on team discussions ( <i>dosage</i> )                                                                           | 90%  |
|                           | <b>Topics</b><br>Goal setting in hand hygiene performance ( <i>content</i> )                                               | 100% |
|                           | Analysis of barriers and formulating improvement activities ( <i>content</i> )                                             | 100% |
|                           | Norms and targets established ( <i>coverage</i> )                                                                          | 100% |
| Social influence          | Nurses address each other in case of undesirable hand hygiene behaviour ( <i>content</i> )                                 | 100% |
| Leadership                | Ward manager discusses hand hygiene compliance rates with team members ( <i>content</i> )                                  | 95%  |
|                           | Ward manager designates hand hygiene as a priority ( <i>content</i> )                                                      | 95%  |
|                           | Ward manager actively supports team members and informal leaders ( <i>content</i> )                                        | 95%  |
| Modelling                 | Informal leaders model social skills of team members in addressing hand hygiene behaviour of colleagues ( <i>content</i> ) | 90%  |
|                           | Informal leaders demonstrate good hand hygiene behaviour ( <i>content</i> )                                                | 90%  |
|                           | Informal leaders instructs and stimulates colleagues in providing good hand hygiene behaviour ( <i>content</i> )           | 90%  |
